1 **Fungal endophytes from salt adapted plants confer salt tolerance and promote growth**  
2 **in Wheat (*Triticum aestivum* L.) at early seedling stage**

3 **Fungal endophytes mediated salt tolerance**

4 Manjunatha Nanjundappa<sup>1,2,3\*</sup>, Nayana Manjunatha<sup>1,2</sup>, Hua Li<sup>1</sup>, Krishnapillai  
5 Sivasithamparam<sup>1</sup>, Michael G K Jones<sup>1</sup>, Ian Edwards<sup>1</sup>, Stephen J Wylie<sup>1</sup>, and Ruchi  
6 Agarrwal<sup>3</sup>

- 7 1. Plant Biotechnology Research Group - Virology, Western Australian State  
8 Agricultural  
9 Biotechnology Centre, School of Veterinary and Life Sciences, Murdoch University,  
10 Perth, Western Australia  
11 2. Division of Seed Technology, ICAR-Indian Grassland and Fodder Research Institute,  
12 Jhansi- 284003, India  
13 3. ICAR-National Research Centre on Pomegranate, Solapur-413255, Maharashtra,  
14 India

15 \*Correspondence: manjuigfri@gmail.com; Tel.: +91 9108206800  
16 ORCID: 0000-0002-3599-5779

17 **Abstract:**

18 With increasing human global population, increased yield under saline conditions is a  
19 desirable trait for major food crops. Use of endophytes, isolated from halophytic hosts, seems  
20 to be an exciting approach for conferring salt tolerance to a salt sensitive crop. Therefore, in  
21 the current study, fungal endophytes were isolated from halophytic plants' roots and their  
22 ability to withstand in vitro salt stress was evaluated. They could withstand upto 1M NaCl  
23 concentrations and this tolerance was independent of their host or tissue source. When  
24 inoculated on salt sensitive wheat seeds/seedlings several of the endophytes showed a  
25 positive impact on germination and biomass related parameters upon salt stress, both *in vitro*  
26 and under glasshouse conditions. One of the isolate from dicot plants (identified as  
27 *Microsphaeropsis arundinis*) could successfully colonize wheat and promote its growth under  
28 salt and no salt conditions. Amongst the fungal isolates that are known to be natural  
29 endophytes of wheat, *Chaetomium globosum* was the best performing isolate which has been  
30 reported as an effective biocontrol agent earlier. Based on the results of our preliminary  
31 study, we suggest that these fungal endophytes could prove beneficial for salt stress tolerance  
32 enhancement of wheat crop.

33 **Keywords:** endophytes, salt tolerance, halophytes, growth promoting activity,  
34 *Microsphaeropsis arundinis*, wheat

35  
36 Soil salinity is considered the scourge for plant growth and crop productivity  
37 worldwide<sup>1</sup>. Approximately 1125 m ha of land throughout the world is affected by high  
38 levels of salt due to intensive agriculture and desertification processes<sup>2</sup>. Increase in salinity  
39 tolerance for the world's two major crops, wheat and rice, is an important goal as the world's  
40 population is increasing more rapidly than the area of agricultural land<sup>3</sup>. Seed germination  
41 and seedling growth of wheat, like other crops, has been found to be negatively affected by  
42 salinity stress<sup>4,5</sup>. As a consequence, plant tolerance to salt, mainly to the sodium cation (Na<sup>+</sup>),  
43 is a desirable trait to be selected in cultivated crop plants. To overcome salinity stress,  
44 tolerant variety can be developed through agronomical and breeding or advanced molecular  
45 techniques, but these are time consuming and highly expensive. In this regard, one of the

46 alternative approaches to achieve normal plant growth under salt stress is the efficient  
47 utilization of endophytes<sup>6</sup>.

48 Endophytes (endo = within, phyte = plant) represent an important component of the  
49 plant microbiome and comprise of both bacteria and fungi. They are present in all plant  
50 species asymptotically but often promote host performance in terms of growth and  
51 resistance to abiotic and biotic stresses. Endophytes isolated from plants growing in warm  
52 soils and coastal saline soils indicate a high commercialization potential in agriculture by  
53 providing increased crop yield in hot and salty water environments, respectively<sup>7,8</sup>. These  
54 previous studies collectively show positive effects of endophytes on improving plant fitness  
55 and survival under the different stress conditions, supporting the hypothesis that the effects of  
56 endophytes on plant salt stress mitigation may be general among different plant taxa and  
57 stress conditions. However, a well-structured study is needed to test this hypothesis.

58 To draw overall conclusions about the positives of endophytes for plant salt stress  
59 tolerance, it is imperative to identify host-endophyte combinations that yield tolerance to salt.  
60 In this regard, we isolated the endophytic fungi associated with halophytic plants growing in  
61 coastal areas of Western Australia and evaluated their ability to tolerate NaCl stress. The  
62 isolates which were tolerant to high concentrations of salt (1 M NaCl), were inoculated on  
63 seeds of salt-sensitive wheat germplasm line to examine their ability to confer salt tolerance  
64 to the new host. The results of the current study are important because they not only open up  
65 exciting possibilities of using endophytes from salt adapted plants for mitigating salt stress in  
66 agricultural crops but also in understanding the underlying biochemical and molecular basis  
67 of plant-endophyte interaction.

## 68 MATERIALS AND METHODS

### 69 *Collection site and sampling*

70 Halophytic plants of eight species were collected from wild populations growing at  
71 three coastal sites in Western Australia. Roots and rhizosphere soil of *Oxalis pes-caprae*  
72 (soursop, *Oxalidaceae*), *Chenopodium album* (fat-hen, *Amaranthaceae*), *Elymus repens*  
73 (couch grass, *Poaceae*), and an unidentified brassicaceous plant (*Brassicaceae*) were  
74 collected at Collins Pool, Birchmont, located beside an estuary. Roots and rhizosphere soils  
75 of *Salicornia quinqueflora* (beaded samphire, *Amaranthaceae*), *Juncus acutus* (rush,  
76 *Juncaceae*), and an unidentified grass (*Poaceae*) were collected at Herron Point, Birchmont,  
77 located beside the same estuary. Rhizosphere soil and stolons of *Ammophila arenaria*  
78 (marram grass, *Poaceae*), and rhizome of *Posidonia australis* (sea grass, *Posidoniaceae*)  
79 were collected from a beach located near the city of Bunbury, Australia (Table S1).

### 80 *Measurement of soil salinity and pH*

81 Soil salinity and pH were calculated in the field (Table S1). Five '5 cm diameter'  
82 cores of soil were collected adjacent to sampled plants, with the exception of the seagrass  
83 samples. Cores were taken to 10 cm depth and thoroughly mixed. A sample of 20 g of soil  
84 was placed in a vessel and 100 mL of distilled water was added. The mixture was shaken  
85 periodically over one hour, then allowed to stand for 30 min before measuring the salinity  
86 (calculated from electrical conductivity) and pH using an EC8500 portable pH and  
87 conductivity meter (Apera Instruments, Ohio) according to the manufacturer's instructions. A  
88 temperature compensation coefficient of 2%/°C was used for calculating salinity. pH  
89 measurements were later confirmed in the laboratory using an Orion Star A111 pH meter  
90 (Thermo Fisher Scientific, Massachusetts).

91 ***Isolation and culture of fungal endophytes***

92 Plant samples were rinsed under running tap water to remove surface debris and soil  
93 particles. Fungal endophytes were isolated using a protocol described before<sup>9</sup>. Petri plates  
94 were incubated at 25°C for 48 h and fungal colonies were counted. Colonization frequency  
95 was estimated as follows:

$$\text{Colonization frequency (\%)} = \frac{\text{Total number of segments yielding fungus}}{\text{Total number of segments incubated}} \times 100$$

96 To obtain pure cultures of each fungal isolate, hyphal tips of colonies were transferred to Petri  
97 plates containing 0.2x potato dextrose agar (PDA) supplemented with streptomycin sulfate  
98 (0.1 mg mL<sup>-1</sup>). Cultures were stored long-term at -80°C in 15% (v/v) glycerol.

99 ***Identification of fungal endophytes***

100 Morphological *viz.*, colony color, mycelial texture and growth rate; and margin  
101 characteristics were recorded for pure fungal cultures. If several isolates of similar  
102 appearance were available from the same host plant then only two were chosen for molecular  
103 identification. Genomic DNA was extracted<sup>10</sup> and Internal Transcribed Spacer (ITS) regions  
104 were amplified by PCR using universal primers ITS1 and ITS4 or ITS4 and ITS5<sup>11</sup>.  
105 Amplified products were quantified and sequenced. Further, the obtained ITS sequences were  
106 compared with those available on databases such as GenBank (NCBI) and UNITE<sup>12</sup> in order  
107 to reveal their identity. Isolates were identified to the species level if their ITS sequences  
108 shared ≥97% pairwise similarity with a named species from the databases analysed. When the  
109 similarity percentage was 95-96%, only the genus name was accepted and for sequence  
110 identities <95%, isolates were classified to the level of family (if available) or labelled as  
111 'unidentified fungus' as described earlier<sup>13</sup>. Sequences were aligned using ClustalW and  
112 percent similarity was obtained using the EMBL-EBI  
113 (<http://www.ebi.ac.uk/Tools/msa/mafft/>) platform. Phylogeny was estimated using the  
114 Maximum Likelihood (ML) method within MEGA v6.06 (<http://www.megasoftware.net/>)  
115 after that 'Find Best DNA Models' was applied to determine the most appropriate model for  
116 construction of respective ML phylogenies. Predicted tree branches were supported with  
117 1000 bootstrap replications.

118 ***Evaluation of endophytic fungal isolates for salt tolerance***

119 Fungal isolates from each plant species were evaluated for tolerance to salt *in vitro*.  
120 Endophytic fungal isolates were sub-cultured on PDA and allowed to grow for 7 d. A 5 mm<sup>2</sup>  
121 agar plug of mycelium was excised from the edge of the colony and used to inoculate potato  
122 dextrose salt agar (PDSA) plates, which were PDA plates amended with 1.0 M NaCl. Fungal  
123 colonies grown on PDA plates served as control. Cultures were incubated at 25°C in the dark.  
124 Three replications were maintained for each treatment. The diameter of each mycelial colony  
125 was recorded on the seventh day following plate inoculation. Diametrical growths of colonies  
126 were measured at three different diameters per plate and the mean of these measures for  
127 overall replications was calculated. Inhibition of growth under treatment on PDSA medium  
128 was calculated as a percentage of growth of the same isolate growing on PDA medium.  
129 Classification of salt tolerance of endophytic fungi was as described previously<sup>14</sup>. Highly  
130 tolerant fungal endophytes were used for further studies.

131 ***In vitro screening of fungal endophytes for conferring salt tolerance to host***

132 The wheat genotypes obtained from Edwards's laboratory, SABC, Murdoch  
133 University, Perth, Australia were initially screened for tolerance at different salt

134 concentrations. All wheat genotypes were found highly sensitive to salt (NaCl) at 150 mM  
 135 concentration (data not shown), therefore this concentration was used in the current study.  
 136 Among the wheat genotypes GP#15, with agronomical superiority, was used for further  
 137 studies. The selected fungal endophytes were evaluated *in vitro* for their ability to impart  
 138 salinity tolerance to a salt-sensitive wheat genotype at 150 mM NaCl. Two different  
 139 methodologies were employed for the *in vitro* stress tolerance studies: agar media based  
 140 method and filter paper methods as illustrated in Figure 1.

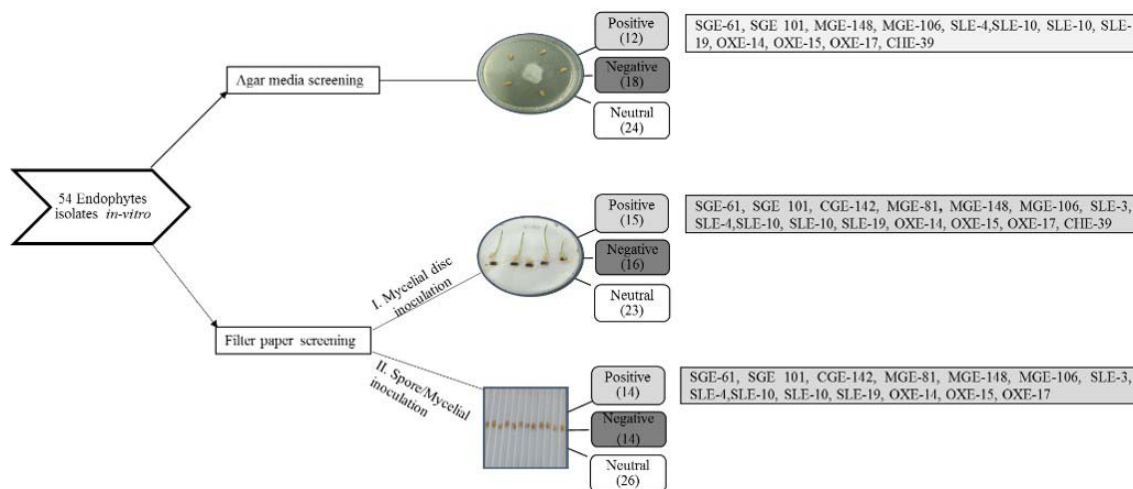

141 **Fig. 1** Schematic representation of different approaches employed for *in vitro* screening of  
 142 fungal endophytes, isolated from halophytic species, that conferred salt (150 mM NaCl)  
 143 tolerance to wheat seedlings (observation were made at 10 days after treatment). The number  
 144 in the parenthesis indicates counts of the endophyte isolates showing respective interaction:  
 145 **Positive**= enhanced tolerance, **Negative** = decreased tolerance or retarded growth upon  
 146 inoculation, **Neutral** = no measurable influence. Names of the isolates have been provided in  
 147 the box  
 148

#### 149 i. Agar media based test

150 Each fungal endophyte was applied individually to wheat (GP#15) seeds according to  
 151 method described<sup>15</sup>. Briefly, a 5 mm<sup>2</sup> agar plug, cut from the margins of the 10 day old  
 152 colony were placed, hyphal side down, in the middle of each Petri dish containing 2/4th  
 153 strength PDA media amended with 150mM NaCl (each Petri dish was filled 2/3rd with media  
 154 and assumed variation was minimized by replication) and then incubated at 25°C. Five  
 155 surface sterilized seeds were placed at a distance equivalent to 24 h and 72 h grown culture  
 156 plates for fast growing and slow growing isolates respectively. The Petri dishes were sealed  
 157 with parafilm and then incubated at room temperature (25°C). 10 days post-inoculation (dpi),  
 158 the parafilm was removed and observations on host endophyte reaction were recorded. The  
 159 control treatments contained no fungus. Each fungal inoculation or control was replicated at  
 160 least three times.

#### 161 ii. Filter paper based test

162 Long strips were made from filter paper (Whatman 10312209, Grade 598) and two  
 163 strips per furrow were placed in plastic plate with 12 furrows as shown in Figure 1. Sodium  
 164 chloride solution (250 µl of 150 mM NaCl) was added in each furrow and surface sterilized  
 165 wheat seed were placed in center of each furrow. The plates were sealed with parafilm  
 166 (Parafilm<sup>®</sup> M, P7793, Sigma) and incubated at 25°C in an inclined position to facilitate  
 167 downward root movement. Once radicle had grown 5 mm in length, a 3 mm<sup>2</sup> agar plug made

168 from the growing edge of endophytic fungal colony was placed along the radicle of each  
169 seedling and plates were sealed again with parafilm and incubated as before. At 10 dpi, the  
170 parafilm was removed and host-endophyte reaction was recorded. The control treatments  
171 with an agar plug contained no fungus.

172 Using agar media based method, germination kinetics parameters such as germination  
173 percentage (G%) and mean germination time (MGT) and biomass related parameters such as  
174 root length, shoot length and seedling fresh weight were recorded for hosts inoculated with  
175 endophytes (n=13), referred to as endophyte inoculated (EI) seeds hereafter. Control plates  
176 contained non-inoculated (NI) wheat seeds placed on media with or without salt.

### 177 ***Root colonization by fungal endophytes***

178 Trypan blue (0.01% w/v) staining was used to identify fungal mycelium within root  
179 tissues using a method used earlier<sup>16</sup> with suitable modifications applicable to root tissues.  
180 Briefly, seedlings inoculated on filter paper (Method I and II) were collected 15 dpi. Roots  
181 were cut into approximately 0.5 cm segments and were cleared with acetic acid:ethanol (1:3  
182 v/v) solution for 12 h. A second tissue clearing was done by soaking tissues in acetic  
183 acid:ethanol:glycerol (1:5:1 v/v/v) solution for 5 h. The samples were subsequently incubated  
184 overnight in a staining solution of trypan blue. Stained tissues were rinsed with 60% sterile  
185 glycerol and stored in it until examination. Specimens were examined under an Olympus BX  
186 51 optical microscope (Olympus, Japan). Five to ten segments were assessed per endophyte  
187 inoculation treatment.

### 188 ***Glasshouse based evaluation of fungal endophytes for conferring salt tolerance to host***

189 Based on the ability of isolates in conferring salt tolerance to wheat *in vitro*, 11  
190 isolates were further selected (SLE-6, SLE-10, SLE-19, OXE-14, OXE-17, SGE-60, SGE-61,  
191 MGE-81, MGE-106, MGE-148 and CGE-142) for glasshouse experiment. Spore suspensions  
192 were prepared from 10 day old cultures of highly salt tolerant fungal isolates growing in 2/4th  
193 strength potato dextrose broth and incubated on a shaker. The mycelial pellicle was washed  
194 in sterile water to remove residual broth, then macerated in a blender and filtered through  
195 sterile cotton wool. The number of spores was counted using a haemocytometer and diluted  
196 to  $1 \times 10^7$  spores mL<sup>-1</sup>. Wheat seeds were soaked in spore suspension, of individual endophyte,  
197 overnight after which they were taken out from the suspension and shade dried. Five seeds  
198 were sown in perforated pots filled with perlite and sand (3:2). The pots were placed in  
199 plastic trays either containing 150 mM NaCl solution or water. Each tray contained 6 pots  
200 and 500 ml salt solution or water (each pot served as one replication). Similarly seeds soaked  
201 in water were sown in six separate pots and placed in a tray containing water and served as  
202 control. Once in 3 days salt solution was replaced with fresh salt solution (to avoid salt  
203 accumulation in trays they were washed thoroughly and solution was replaced). Results were  
204 reconfirmed by repetition of experiment.

### 205 ***Evaluation of physiological and biomass related parameters of host***

#### 206 **i. Chlorophyll content (CC)**

207 Chlorophyll content was measured from fully expanded leaves (1<sup>st</sup> leaf as shown in  
208 Figure S1) of seedlings by a hand-held chlorophyll meter (CCM-200 plus, Opti-Sciences Inc.,  
209 Hudson, NH, USA). Three seedlings per pot were investigated. A total of eighteen seedlings  
210 were considered from each treatment and averaged value was taken as CC per seedling.  
211 Chlorophyll data measurement was carried out 7, 11 and 15 days after stress was imposed,  
212 just before the plants were harvested.

#### 213 **ii. Relative Water Content (RWC) and Biomass**

214 Fully expanded leaf of wheat seedling was used to estimate RWC. A total of 10 leaves  
215 were harvested randomly from six pots in each treatment. The leaves were placed in  
216 polythene bags and transported to the laboratory as quickly as possible in order to minimize  
217 water losses due to evaporation and were also weighed immediately to obtain fresh weight  
218 (Fw). Then, leaves were soaked in distilled water in test tubes for 24 h at 4 °C in the dark,  
219 and turgid weight (Tw) was noted. Subsequently, samples were dried in the oven at 70 °C for  
220 24 h, and dry weight (Dw) was measured. RWC of seedling was determined as:

$$221 \quad \text{RWC} = (\text{Fw} - \text{Dw}) / (\text{Tw} - \text{Dw}) \times 100.$$

222 A total of six seedlings were selected per treatment for the estimation of seedling  
223 biomass parameters viz., root length, shoot length and root and shoot dry weight. Seedlings  
224 were divided into roots and shoots, and soil was washed from roots by hand. Samples were  
225 desiccated for 48 h at 80 °C, and dry weight (mg) was recorded. Also, root to shoot ratio was  
226 calculated based on their length.

### 227 *Statistical analysis*

228 To describe the variability, several simple univariate analysis including means, ranges  
229 and variance were calculated. Coefficients of variation (CV%) was also calculated from the  
230 variance components and the overall means for all the investigated treatments. Clustering of  
231 different treatments based on the CC was carried out using ‘Fastcluster’ package of R  
232 statistical software (version 3.4.4) with squared Euclidean distance as a measure of  
233 dissimilarity and incremental sums of squares as a grouping strategy<sup>17</sup>. Data of all characters  
234 were standardized to a mean of zero and variance of one and Principal Component Analysis  
235 (PCA) was performed. First, second and third principal component axes scores were plotted  
236 together to visualize the effect of different treatments simultaneously.

## 237 **RESULTS**

238 All halophytic plants examined were found to be colonized by multiple culturable  
239 fungal endophytes. Two hundred and forty two fungal isolates were obtained from 320 plant  
240 specimen and their colonization frequency ranged from 63% to 96% (Figure S2). A high  
241 number (96%) of endophytic fungi were isolated from the root tissues of *J. acutus* and *S.*  
242 *quinqueflora* plants (Figure S2). Pure fungal cultures were initially grouped according to their  
243 morphological (viz., colony color, mycelial texture and growth rate) and margin  
244 characteristics.

### 245 *Endophytes showed differential response to salinity in vitro*

246 One hundred and thirty fungal isolates were screened for their responses to 1.0 M  
247 NaCl *in vitro*. Based on the degree of inhibition of radial growth on PDSA medium compared  
248 to PDA medium, fungal isolates were grouped as highly-tolerant, tolerant, moderately-  
249 tolerant, or sensitive (Table S2) as described earlier<sup>14</sup>. Most isolates (58) were grouped into  
250 the moderately-tolerant category, followed by 39 isolates that were tolerant and 27 that were  
251 highly-tolerant. The growth of 6 isolates was severely inhibited on PDSA therefore they were  
252 categorised as sensitive. Endophytes originating from monocotyledonous and dicotyledonous  
253 halophytes differed in their salt tolerance as shown in the Figure 2. Most isolates from  
254 dicotyledonous halophytic hosts had moderate to high salt tolerance whereas most  
255 endophytes from monocotyledonous hosts had moderate tolerance. Among the halophytes,  
256 sea grass, a species constantly immersed in seawater (~550 mM NaCl), was colonised with  
257 the most highly salt-tolerant endophytes. Moreover, isolates inhabiting the same host also  
258 showed differential levels of salt tolerance.

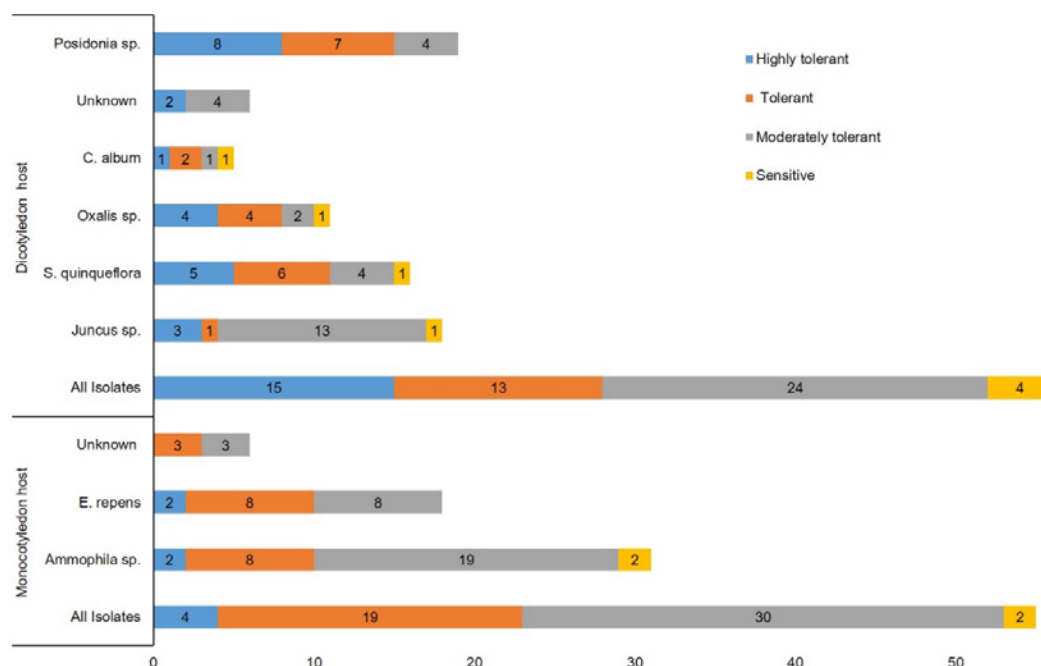

259

260

261

**Fig. 2** Categorization of endophytes originating from monocotyledonous and dicotyledonous halophytes based on the difference in their salt tolerance

60

262

### ***Fungal endophytes inhabiting halophytes belonged to highly diverse genera***

263

264

265

266

267

268

269

270

271

272

273

274

275

276

277

278

279

280

281

282

283

284

Based on morphological characteristics and inherent salt tolerance, fifty-four representative fungal isolates were selected for molecular identification, where several isolates of similar appearance were isolated from the same host plant, only two isolates were chosen for molecular identification. The chosen isolates were identified based on ITS-amplicon sequencing results followed by database similarity search. The ITS sequences obtained have been deposited in the NCBI GenBank (Accession No. MK431041-MK431094; Table S3). Database similarity search revealed that diverse fungal flora had colonized the halophytic hosts used in the study. Twenty isolates could be identified completely i.e. upto species level with some unidentified to the genus level (Table S3). All endophytes isolated from halophytes were members of phylum Ascomycota and most of them belonged to subphylum *Pezizomycotina* (48), and were distributed in three classes viz., *Dothideomycetes* (17) *Eurotiomycetes* (7) and *Sordariomycetes* (24). Among the fungal orders, *Hypocreales* (15), *Pleosporales* (17) and *Eurotiales* (7) were the most highly represented (Figure 3). Dominant genera identified in this study were *Alternaria*, *Chaetium*, *Fusarium* and *Penicillium*, whereas genera that were represented by only one or a few isolates were *Aquanectria*, *Aspergillus*, *Bipolaris*, *Clonostachys*, *Didymella*, *Didymosphaeria*, *Microascus*, *Paraconiothyrium*, *Paraphaeosphaeria*, *Phaeosphaeria*, *Phoma*, *Phomopsis*, *Plectosphaerella*, *Setosphaeria*, *Soradria* and *Trichoderma*. The six isolates that could not be identified were classified as *Incertae sedis*. Further, phylogeny revealed that highly salt-tolerant endophytic isolates grouped into a single cluster (Figure 4) indicating that they may share some similarity at genetic level. No phylogenetic pattern was however evident with regard to plant tissue type or host species (data not shown).

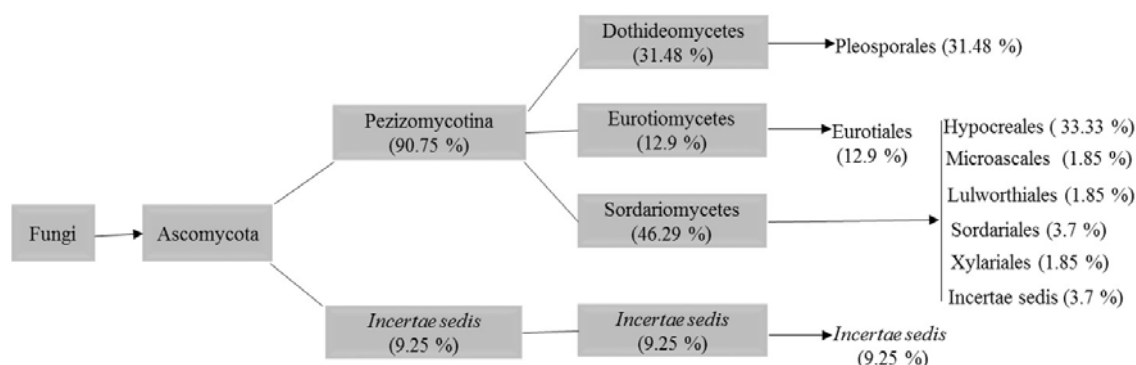

285  
286  
287  
288

**Fig. 3** Schematic representation of phylogenetic placement of 54 fungal species identified from ITS sequences of endophytes isolated from different halophytic species. Classification follows Hibbett et al. (2007)

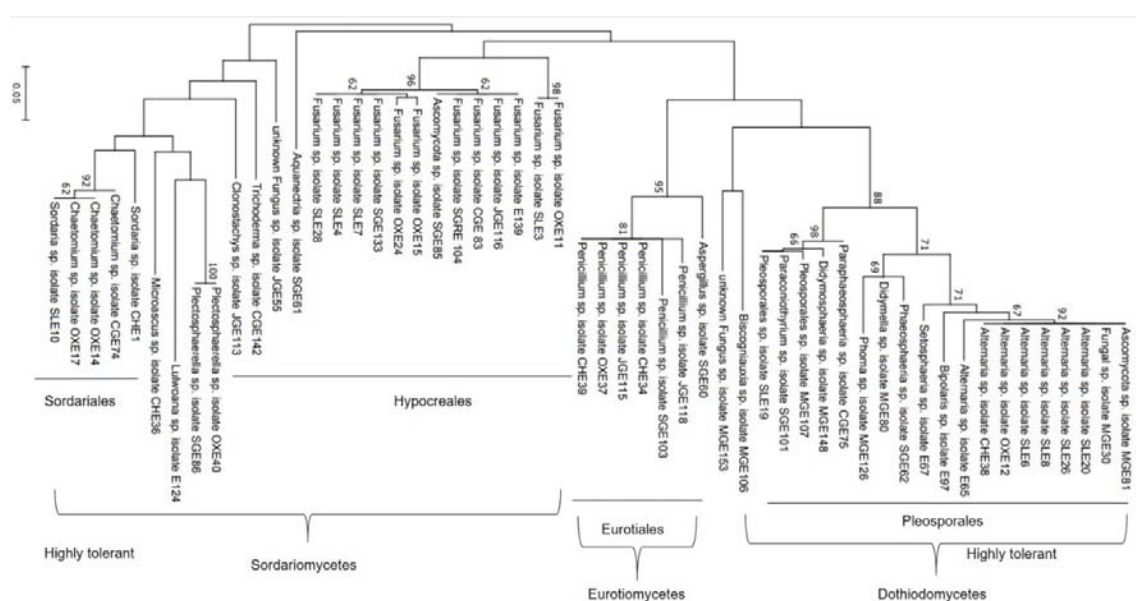

289  
290  
291

**Fig. 4** Phylogenetic analysis of fungal endophytes isolated from halophytic hosts revealed that highly salt-tolerant endophytic isolates grouped into a single cluster

292 ***Fungal endophytes isolated from different tissues showed positive impact on salinity***  
293 ***tolerance of wheat in-vitro***

294 Seeds of the salt-sensitive wheat genotype (GP#15) were inoculated with 54  
295 endophytes and the performance was evaluated on 150 mM NaCl using different approaches  
296 (Figure 1). Isolates enhancing seedling salt stress tolerance had been isolated from all type of  
297 tissues used under study. However, on agar method 21 % of isolates from the roots had  
298 positive impact whereas on filter paper method, 27 % of isolates from stolons had more  
299 positive impact (Figure S3). Based on their positive impact on seedling performance under  
300 salinity, some of these isolates were used for further analysis. Roots of EI seedlings were  
301 examined under a light microscope for the proof of endophytic colonization. Stained roots  
302 highlighted the presence of a network of hyphae, most of which penetrated the intercellular  
303 spaces of the root (Figure 5). The pure culture of some of these isolates are shown in Figure  
304 S4.



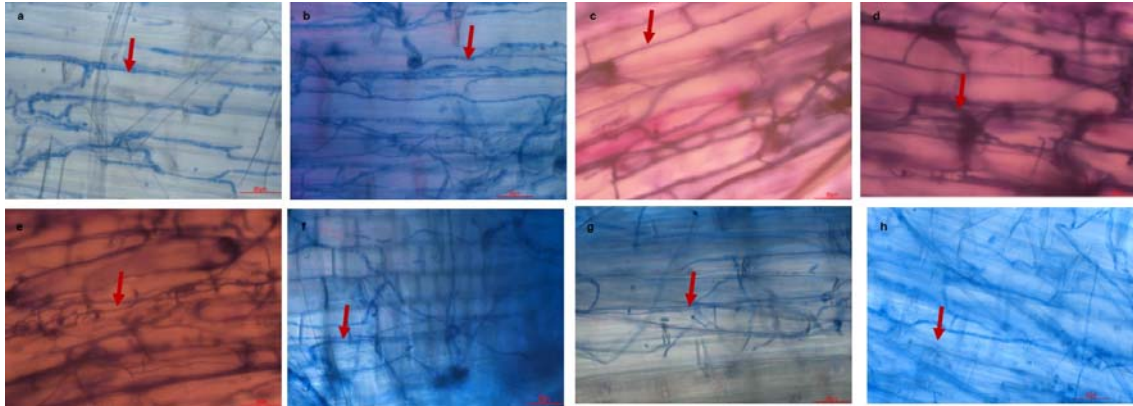

305

306 **Fig. 5** Colonization by the fungal isolates inside the root tissue of salt sensitive wheat  
307 inoculated in the filter paper screening test. The red-coloured arrow head indicates the  
308 presence of fungal mycelia as observed under a compound microscope stained after trypan  
309 blue staining a) *Trichoderma atroviride* b) *Alternaria infectoria* c) *Alternaria chlamydospora*  
310 d) *Microsphaeropsis arundinis* e) *Didymosphaeria variabile* f) *Chaetomium globosum* g)  
311 *Chaetomium globosum* h) *Chaetomium globosum*

312 ***Fungal endophytes promotes growth of wheat at early seedling stage under saline***  
313 ***conditions***

314 Seeds of the salt-sensitive wheat genotype (GP#15) were treated with promising  
315 endophytes (n=13) and the performance of the seedlings was analyzed both *in vitro* and under  
316 glasshouse conditions after subjecting them to salt stress (150 mM NaCl).

317 Observations of *in vitro* assay revealed that G% of EI seeds placed on salt containing  
318 media (SCM) ranged from 88.8 to 97.7%. The NI seeds showed 91% germination on SCM  
319 and 97.7% on media without salt (MWS) indicating a higher germination rate in EI seeds  
320 than NI seeds on SCM. The EI seeds placed on SCM showed mean germination time (MGT)  
321 lesser than NI seeds on the same media, indicating that EI seeds germinated faster than NI  
322 seeds when placed on SCM. However, the least MGT was recorded for NI seeds placed on  
323 MWS (Figure 6).

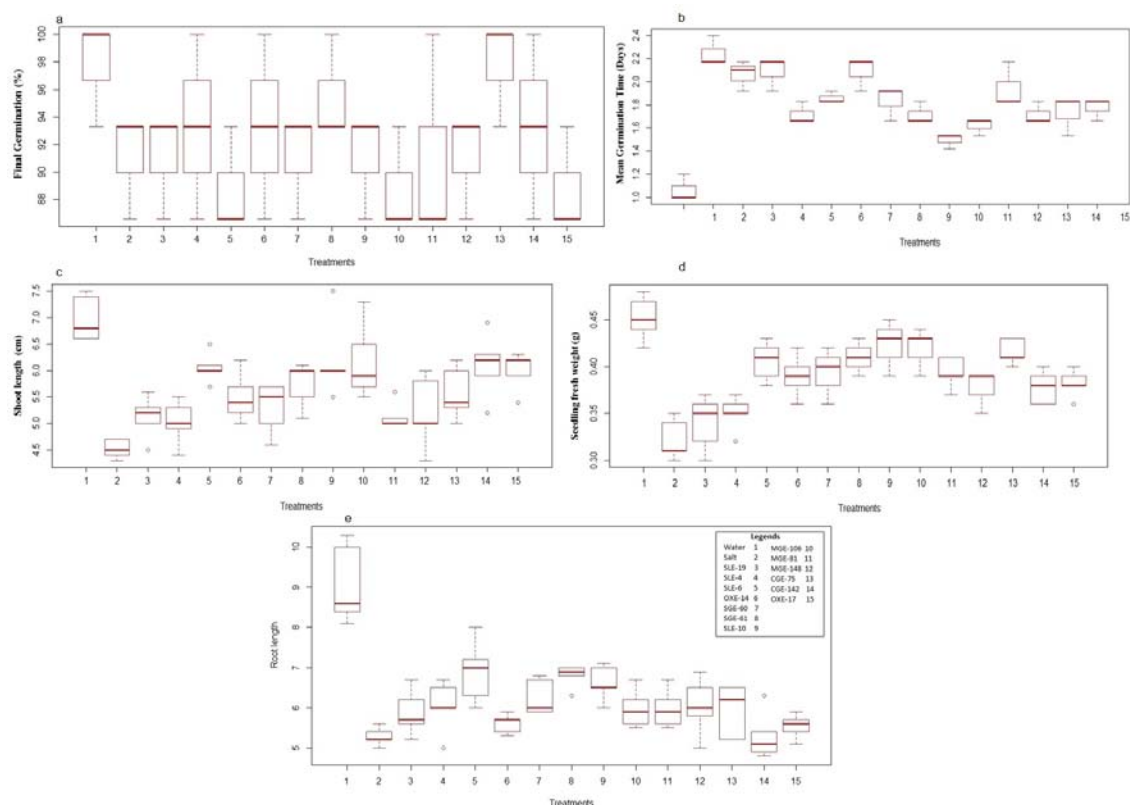

324  
325

326 **Fig. 6** Measurement of germination kinetics parameters and seedling biomass related  
327 parameters after subjecting the endophyte inoculated wheat (GP#15) seeds to salt stress  
328 (NaCl 150 mM) *in vitro*

329 Similar trends were observed for seedling biomass related parameters such as root  
330 length, shoot length and seedling fresh weight. The EI seedlings showed higher biomass as  
331 compared to NI seedlings on SCM (Figure 6). All the endophytic isolates improved the  
332 performance of the wheat seedlings under salt stress, however, we selected 11 best  
333 performing isolates for the glass house based studies (Table 1).

334 **Table 1** Endophytic fungal isolates identified and used in the current study for evaluating  
335 their ability to confer salt (150mM NaCl) tolerance to wheat seeds/seedlings *in vitro* or in  
336 glass house respectively.

| S. No. | Isolate code | Identity based on ITS sequencing and database similarity search | Host species                   | Salt tolerance  | Accession no. |
|--------|--------------|-----------------------------------------------------------------|--------------------------------|-----------------|---------------|
| 1.     | SLE-6        | <i>Alternaria chlamydospora</i>                                 | <i>Salicornia quinqueflora</i> | Highly tolerant | MK431069      |
| 1.     | SLE-19       | <i>Microsphaeropsis arundinis</i>                               |                                | Highly tolerant | MK431073      |
| 2.     | SLE-10       | <i>Chaetomium globosum</i>                                      |                                | Highly tolerant | MK431072      |

|     |         |                                   |                            |                 |          |
|-----|---------|-----------------------------------|----------------------------|-----------------|----------|
| 3.  | OXE-14  | <i>Chaetomium globosum</i>        | <i>Oxalis pes-caprae</i>   | Tolerant        | MK431079 |
| 4.  | OXE-17  | <i>Chaetomium globosum</i>        |                            |                 | MK431081 |
| 5.  | SGE-60  | <i>Aspergillus ochraceus</i>      | <i>Posidonia australis</i> | Highly tolerant | MK431046 |
| 6.  | SGE-61  | <i>Aquanectria penicillioides</i> |                            | Highly tolerant | MK431047 |
| 7.  | MGE-81  | <i>Alternaria infectoria</i>      | <i>Ammophila arenaria</i>  | Highly tolerant | MK431061 |
| 8.  | MGE-106 | Unknown fungal sp.                |                            | Highly tolerant | MK431062 |
| 9.  | MGE-148 | <i>Didymosphaeria variabile</i>   |                            | Tolerant        | MK431065 |
| 10. | CGE-142 | <i>Trichoderma atroviride</i>     | <i>Elymus repens</i>       | Tolerant        | MK431058 |

337 For EI seedlings grown under glasshouse conditions, CC was measured at 7, 11 and 15 days  
 338 after stress (das) treatment (Figure 7) to study the effect of duration of stress on CC of leaves.  
 339 Chlorophyll estimation was also performed for NI seedlings grown in solution with or  
 340 without salt at the same time points. Higher CC was observed in seeds treated with fungal  
 341 isolate CGE-142, especially as the duration of stress increased (11 and 15 das). Similarly,  
 342 CGE-142 inoculation enhanced the CC of seeds grown in solution without salt (SWS). These  
 343 values were higher than the CC of NI seeds grown in SWS or salt containing solution (SCS),  
 344 indicating that the fungal isolate induced higher chlorophyll synthesis in wheat seedlings.

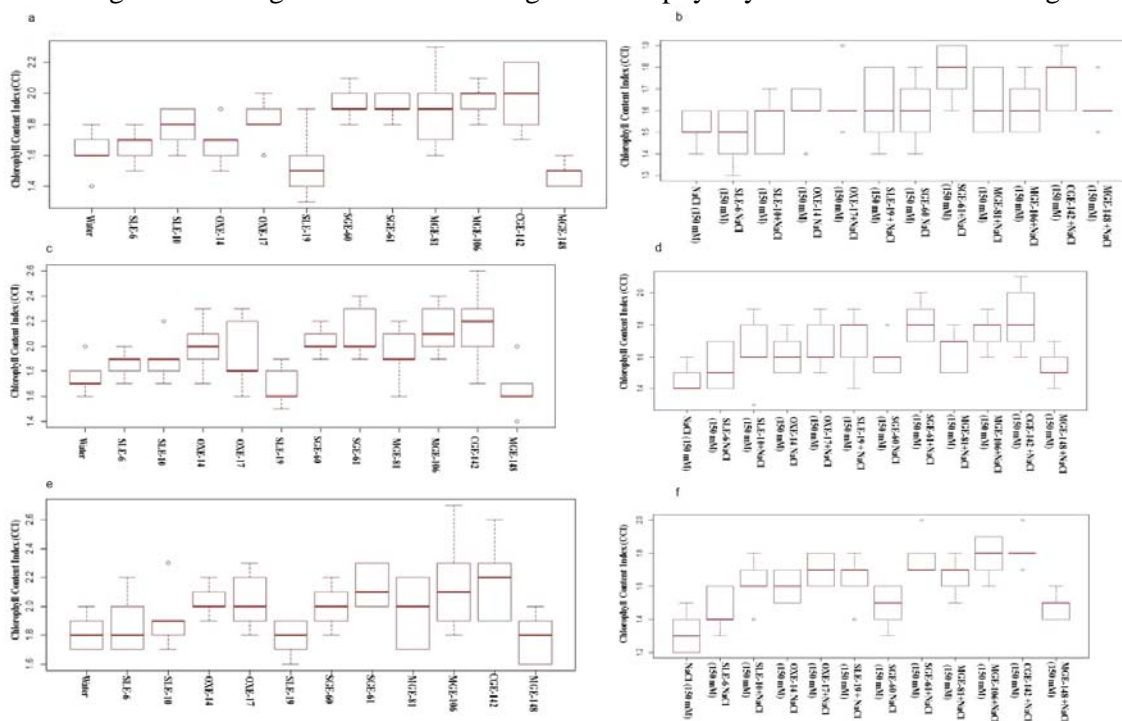

345  
 346

347 **Fig. 7** Measurement of chlorophyll content index of endophyte inoculated wheat (GP#15) seedlings at 7 (a, b), 11 (c, d) and 15 (e, f) days of salt  
 348 stress (b, d, f) or no stress (a, c, e) under glass house condition

349 All the fungal endophytic isolates improved the RWC of wheat seedlings as compared to NI seedlings when grown in SCS (Table 2). The  
 350 highest RWC was observed in seedlings inoculated with CGE-142. With regard to biomass-related parameters, seedlings inoculated with SLE-  
 351 10 exhibited root and shoot biomass (fresh weight, dry weight and length) as well as root to shoot ratio higher than NI seedlings grown in SCS.  
 352 However, similar trend was observed in seedlings inoculated with CGE-142 in the absence of salt (Table 3).

353 **Table 2** Measurement of biomass related parameters of endophyte inoculated wheat (GP#15) seedlings grown under salt stress condition in the  
 354 glass house

| Isolate code  | RWC (%) | % change over control | RDW (g) | % change over control | SDW (g) | % change over control | RL (cm)   | % change over control | SL (cm) | % change over control | RSR      | % change over control |
|---------------|---------|-----------------------|---------|-----------------------|---------|-----------------------|-----------|-----------------------|---------|-----------------------|----------|-----------------------|
| SLE-6+NaCl    | 95.0ab  | 5.62                  | 0.07d   | -37.15                | 0.08h   | -32.88                | 8.76def   | 6.07                  | 12.4f   | -7.83                 | 0.74ab   | 20.04                 |
| SLE-10+NaCl   | 93.78b  | 4.28                  | 0.11a   | 0.76                  | 0.13cd  | 9.96                  | 9.70bcdef | 18.69                 | 14.8de  | 9.87                  | 0.66abcd | 10.46                 |
| OXE-14+NaCl   | 95.0ab  | 5.61                  | 0.07d   | -37.43                | 0.11ef  | -5.26                 | 9.20cdef  | 11.63                 | 16.4cd  | 21.20                 | 0.56def  | -8.17                 |
| OXE-17+NaCl   | 90.94c  | 1.15                  | 0.08cd  | -28.55                | 0.12de  | 0.38                  | 12.20a    | 46.44                 | 17.6bc  | 30.86                 | 0.71abc  | 15.27                 |
| SLE-19+NaCl   | 90.90c  | 1.10                  | 0.09bc  | -19.07                | 0.14bc  | 20.27                 | 10.30bcd  | 23.95                 | 18.2bc  | 34.56                 | 0.57cde  | -6.31                 |
| SGE-60+NaCl   | 95.0ab  | 5.63                  | 0.08cd  | -27.76                | 0.09gh  | -23.24                | 8.90cdef  | 7.94                  | 14.8ed  | 8.41                  | 0.62bcd  | 0.23                  |
| SGE-61+NaCl   | 90.9c   | 1.10                  | 0.10ab  | -10.84                | 0.10fg  | -15.79                | 10.56abc  | 27.48                 | 17.3bc  | 28.43                 | 0.62bcd  | 1.58                  |
| MGE-81+NaCl   | 95.82ab | 6.57                  | 0.09bc  | -18.61                | 0.10fg  | -13.79                | 11.10ab   | 32.61                 | 14.7def | 9.03                  | 0.76a    | 24.96                 |
| MGE-106+NaCl  | 96.32a  | 7.11                  | 0.04e   | -63.45                | 0.15ab  | 28.96                 | 8.06f     | -3.77                 | 18.9ab  | 39.50                 | 0.43f    | -31.18                |
| CGE-142+NaCl  | 96.02a  | 6.78                  | 0.04e   | -63.72                | 0.16a   | 35.65                 | 9.80bcde  | 19.05                 | 20.9a   | 54.10                 | 0.47ef   | -22.87                |
| MGE-148+NaCl  | 91.28c  | 1.48                  | 0.07d   | -37.43                | 0.10fg  | -15.79                | 8.20ef    | 0.10                  | 13.0ef  | -3.97                 | 0.63abcd | 3.61                  |
| NaCl (150 mM) | 90.0c   |                       | 0.11a   |                       | 0.12de  |                       | 8.36ef    |                       | 13.6ef  |                       | 0.62bcd  |                       |

355 RWC: Relative water content, RDW: Root dry weight, SDW: Shoot dry weight, RL: Root length, SL: Shoot length, RSR: root to shoot ratio based on length.  
 356 Same letters indicate statistically insignificant differences (p>0.05)

357

358 **Table 3** Measurement of biomass related parameters of endophyte inoculated wheat (GP#15) seedlings grown under no stress condition in the  
 359 glass house

| Isolate code | RWC (%) | % change over control | RDW (g) | % change over control | SDW (g) | % change over control | RL (cm) | % change over control | SL (cm) | % change over control | RSR     | % change over control |
|--------------|---------|-----------------------|---------|-----------------------|---------|-----------------------|---------|-----------------------|---------|-----------------------|---------|-----------------------|
| SLE-6        | 88.29b  | 11.31                 | 0.12bc  | 7.09                  | 0.13de  | -12.58                | 12.6e   | <b>-9.98</b>          | 14.8de  | -6.29                 | 0.85cde | -3.48                 |
| SLE-10       | 88.39b  | 11.44                 | 0.12bc  | 11.09                 | 0.14cd  | -6.24                 | 14.9dc  | 6.21                  | 15.0de  | -4.92                 | 1.01bc  | 13.78                 |
| OXE-14       | 88.57b  | 11.67                 | 0.14a   | <b>29.54</b>          | 0.13e   | -13.89                | 16.3bc  | 16.61                 | 14.3de  | -9.28                 | 1.18a   | <b>32.37</b>          |
| OXE-17       | 88.37b  | 11.42                 | 0.13ab  | 17.43                 | 0.16ab  | 5.52                  | 13.58de | -2.78                 | 18.2bc  | 15.30                 | 0.75de  | -15.36                |
| SLE-19       | 91.89a  | 15.88                 | 0.12bc  | 7.09                  | 0.12e   | <b>-21.20</b>         | 17.2ab  | 22.82                 | 16.0cd  | 1.18                  | 1.07ab  | 20.91                 |
| SGE-60       | 92.31a  | <b>16.42</b>          | 0.13ab  | 17.43                 | 0.13de  | -12.83                | 14.9dc  | 6.00                  | 16.8bcd | 6.14                  | 0.91c   | 3.04                  |
| SGE-61       | 88.37b  | 11.43                 | 0.14a   | 27.49                 | 0.14cd  | -6.24                 | 17.3ab  | 23.64                 | 18.8b   | 19.13                 | 0.94bc  | 5.58                  |
| MGE-81       | 84.61c  | 6.69                  | 0.14a   | 27.09                 | 0.16ab  | 5.52                  | 17.4ab  | 23.76                 | 18.06bc | 14.32                 | 0.96bc  | 8.26                  |
| MGE-106      | 88.56b  | 11.67                 | 0.12bc  | 6.43                  | 0.17a   | <b>13.37</b>          | 13.4de  | -4.15                 | 18.8b   | 19.09                 | 0.71e   | <b>-19.30</b>         |
| CGE-142      | 91.85a  | 15.83                 | 0.13ab  | 16.98                 | 0.16ab  | 5.52                  | 18.6a   | <b>32.80</b>          | 21.9a   | <b>38.91</b>          | 0.85cde | -3.97                 |
| MGE-148      | 91.67a  | 15.59                 | 0.11c   | 0.22                  | 0.12e   | <b>-21.20</b>         | 12.64e  | -9.73                 | 13.0e   | <b>-17.72</b>         | 0.99bc  | 10.76                 |
| Mock         | 79.31d  |                       | 0.11c   |                       | 0.15bc  |                       | 14.04de |                       | 15.8cd  |                       | 0.89cd  |                       |

360 RWC: Relative water content, RDW: Root dry weight, SDW: Shoot dry weight, RL: Root length, SL: Shoot length, RSR: root to shoot ratio based on length.  
 361 Same letters indicate statistically insignificant differences (p>0.05)

362

## 363 DISCUSSION

364 The ability to tolerate briny water is essential for wild plants that live in coastal and  
365 marine environments. Such halophytic plants appear to associate widely with fungi as evident  
366 from the wide range of fungi described from marine-influenced systems of coastal sand  
367 dunes, mangroves, seagrass and estuaries. Although, the roles played by these fungal  
368 endophytes in salt tolerance of halophytes could be dependent on several factors<sup>18</sup> it can be  
369 expected that their association with such hosts would provide them salt tolerance too<sup>19</sup>.

370 Therefore, in the current study, we isolated fungal endophytes from halophytic plants  
371 and tested their response to a high-salt environment *in vitro*. We challenged the endophytes  
372 with a NaCl concentration (upto 1M NaCl) almost twice that of seawater. This concentration  
373 reduced the growth rate of all isolates, but for many, growth inhibition was <50% that of low  
374 salt conditions, an indication of tolerance to high osmotic gradients. We are aware that the  
375 environment on PDSA medium is not likely to be equivalent to conditions in the interstitial  
376 spaces between cells of salt-tolerant plants due to two reasons. Firstly, on a solid medium  
377 mycelium is not immersed in an aqueous environment. Secondly, plants actively pump Na<sup>+</sup>  
378 and Cl<sup>-</sup> ions from the roots, they compartmentalize salts in vacuoles, and they develop  
379 osmotic tolerance (involving long-distance signalling) to cope with saline environments<sup>20</sup>.  
380 Thus, the salinity experienced by the fungus within the plant may be less than the external  
381 salt concentration. Hence, if the fungal isolates could tolerate high salt concentration *in vitro*,  
382 they can be expected to tolerate salt stress *in planta* also. As reported earlier, the levels of  
383 tolerance to salt by endophytes mainly depends on genetic factors of the fungus species and  
384 host habitat<sup>21</sup>, the range of external salinity and accumulation of osmo-protectants in the  
385 cytoplasm<sup>18,22,23</sup>. Therefore, the observed variations in salt tolerance of fungal endophytes  
386 isolated from different hosts as well as the same host could be due to their genetic  
387 constituents or their interaction with halophytic hosts. This finding is in line with earlier  
388 studies that showed halophyte microbiomes exhibit differential levels of salt tolerance<sup>24,25,26</sup>.  
389 Moreover, all the highly salt tolerant isolates grouped together in a single cluster upon  
390 phylogenetic analysis indicating underlying similarities between them.

391 It is unclear if salt tolerance of fungal endophytes isolated in the current study  
392 corresponded to their possible roles in mediating salinity tolerance in their naturally salt-  
393 adapted host plants, but it would have been interesting to observe their effect on growth of  
394 salt-sensitive crop plants. Therefore, we selected 54 isolates, based on their inherent salt  
395 tolerance, and inoculated them on salt sensitive wheat (GP#15) seeds. Mostly they exerted a  
396 highly positive impact on GP#15 as evaluated by various *in vitro* techniques. These isolates  
397 were then identified based on their ITS region sequences and found to belong to diverse  
398 genera (Figure 3, Table S3). Earlier, endophytes isolated from mangrove leaves have been  
399 reported to belong to *Acremonium*, *Phomopsis*, *Phyllosticta*, and *Sporormiella*<sup>27</sup>, *Diaporthe*<sup>28</sup>,  
400 *Bruguiera*<sup>29</sup>, *Aspergillus* species and others<sup>30</sup>. Only a few of these genera were represented in  
401 our study, the difference could have been due to different tissue from where endophytes have  
402 been isolated, for example we isolated endophytes from roots, however the earlier report had  
403 used leaves of halophytic plants.

404 Further, some of these isolates (n=11) were selected for evaluating their growth  
405 promoting activity on GP#15 when subjected to salt stress *in vitro* and under glasshouse  
406 conditions. Their effect on germination kinetics of GP#15 seeds *in vitro* was also recorded.  
407 Germination related parameters such as G% and MGT were better for EI wheat seeds than NI  
408 seeds placed on SCM. Our results also showed that the endophytes inhabiting wheat plants  
409 not only promote the growth of the seedling but also confer salt tolerance to the host as  
410 compared to the NI control. This was found to be associated with an altered CC and RWC of  
411 the wheat seedlings as well as enhanced biomass. Notably, the endophyte treatment provided

412 an advantage to the wheat seeds with regard to their germination and biomass related  
413 parameters when exposed to saline conditions. Endophytic association is a promising  
414 approach to enhance salt tolerance, although specific mechanisms for this are unclear. The  
415 presence of endophytes may stimulate inherent plant responses to salinity and/or provide  
416 fungus derived compounds that mediate the stress response. In barley, the presence of the  
417 endophyte *Piriformospora indica* induced elevation of ascorbic acid and antioxidant enzymes  
418 in roots under salt stress<sup>31</sup>. *Phoma glomerata* and *Penicillium* sp. endophytes in dwarf rice  
419 secreted gibberellic acid and indole acetic acid to promote growth under saline conditions<sup>32</sup>.

420 The basis for selecting these 11 isolates was mainly driven by their salt tolerance  
421 ability, however we also tried to include isolates that have never been reported to inhabit  
422 wheat naturally. Interestingly, when the roots of EI seedlings were observed under  
423 microscope they were found to be colonised by these fungal isolates successfully. Therefore,  
424 our study reports for the first time, the colonization of wheat roots by *Microsphaeropsis*  
425 *arundinis*, *Aspergillus ochraceus*, *Aquanectria penicillioides*, *Didymosphaeria variabile*.  
426 Among these isolates the best growth promoting activities were exhibited by  
427 *Microsphaeropsis arundinis* under both salt and no salt conditions in the glasshouse. This  
428 endophyte was isolated from a dicot host but when inoculated on wheat (a monocot), it could  
429 not only colonize the new host successfully (Figure 5d) but also promote its growth  
430 irrespective of the presence of salt in the growing medium. Amongst the fungal isolates that  
431 are known to be natural endophytes of wheat, *Chaetomium globosum* was the best performing  
432 isolate. This fungus has been reported to be useful as a bio-control agent against a broad  
433 range of pathogens or insect pests<sup>33,34</sup>. Moreover, its effect on wheat seedlings under drought  
434 conditions has also been reported<sup>35</sup>. Therefore, in addition to these reports, based on the  
435 results of the current study we suggest that *Chaetomium globosum* may be useful in  
436 conferring resistance to biotic stress as well as tolerance to abiotic stress to wheat seedling.  
437 The current work represents the first step in the process of identifying candidate endophytes  
438 to partner with agricultural plants threatened by saline soils. However, the biochemical and  
439 molecular mechanism for conferring salt tolerance to new host needs to be elucidated in  
440 future. Furthermore, future studies should be focused on application of potential salt tolerant  
441 isolates obtained in this study either alone or in combination to impart salt tolerance in  
442 different cereal crops under varied salt concentrations.

## 443 CONCLUSION

444 The amount of salt-affected agricultural land is expected to increase globally in  
445 response to climate change. Progress towards increasing crop tolerance to salt through  
446 traditional breeding has had limited success, largely because of the genetic complexity of the  
447 trait. Endophytes surviving at extreme environmental conditions (dryness, salinity,  
448 temperature, heavy metals, etc.) have been found suitable for use in different agricultural  
449 practices to combat the effects of such abiotic stress on crop productivity. In the present  
450 work, culturable endophytic fungi with different taxonomic affinities were isolated from  
451 halophytic plant species. In-vitro studies showed majority of the isolates were found tolerant  
452 to high concentration of salt (1.0 M NaCl). When inoculated on seeds of a salt-sensitive  
453 wheat genotype (GP#15) these isolates were found to improve germination kinetics of seeds  
454 and promote the growth of seedlings under saline conditions.

## 455 Acknowledgements

456 NM acknowledges the Department of Education and Training, Australian Government for  
457 providing a fellowship under the Endeavour Research Program, and Murdoch University for  
458 hosting the fellowship. NM and MN thank the Indian Council for Agriculture Research and

459 the Indian Grassland and Fodder Research Institute for granting permission to avail the  
460 fellowship program.

## 461 REFERENCES

- 462 1. Shrivastava P & Kumar R, Soil salinity: A serious environmental issue and plant growth  
463 promoting bacteria as one of the tools for its alleviation. *Saudi J Biol Sci*, 22 (2015) 123.  
464 doi:10.1016/j.sjbs.2014.12.001
- 465 2. Hossain MS, Present scenario of global salt affected soils, its management and importance  
466 of salinity research. *Int Res J Biol Sci*, 1 (2019) 1.
- 467 3. Allam NG, Kinany R, El-Refai E & Ali WY, Potential use of beneficial salt tolerant  
468 bacteria for improving wheat productivity grown in salinized soil. *J Microbiol Res*, 8 (2018)  
469 43.
- 470 4. Hampson CR & Simpson GM, Effects of temperature, salt, and osmotic potential on early  
471 growth of wheat (*Triticum aestivum*). I. germination. *Can J Bot*, 68 (1990)524.
- 472 5. Ramadoss D, Lakkineni VK, Bose P, Ali S & Annapurna K, Mitigation of salt stress in  
473 wheat seedlings by halotolerant bacteria isolated from saline habitats. *SpringerPlus*, 2 (2013)  
474 1.
- 475 6. Ikram M, Ali N, Jan G, Jan FG & Khan N, Endophytic fungal diversity and their  
476 interaction with plants for agriculture sustainability under stressful condition. *Recent Pat*  
477 *Food Nutr Agric*, 11 (2020) 115.
- 478 7. Lucero ME, Barrow JR, Osuna PE, Reyes I & Duke SE, Enhancing native grass  
479 productivity by cocultivating with endophyte-laden calli. *Rangel Ecol Manag*, 61 (2008) 124.
- 480 8. Pan X, Qin Y & Yuan Z, Potential of a halophyte-associated endophytic fungus for  
481 sustaining Chinese white poplar growth under salinity. *Symbiosis*, 76 (2018) 109.
- 482 9. Anjum N & Chandra R, Endophytic bacteria: optimizat on of isolation procedure from  
483 various medicinal plants and their preliminary characterization. *Asian J Pharm Clin Res*, 8  
484 (2015) 233.
- 485 10. Dastogeer KM, Li H, Sivasithamparam K, Jones MG &Wylie SJ, Host specificity of  
486 endophytic mycobiota of wild *Nicotiana* plants from arid regions of northern Australia.  
487 *Microb Ecol*, 75 (2017) 74 [http://doi.org/ 10.1007/s00248-017-1020-0](http://doi.org/10.1007/s00248-017-1020-0)
- 488 11. White TJ, Bruns T, Lee S & Taylor JW, Amplification and direct sequencing of fungal  
489 ribosomal RNA genes for phylogenetics. In: *PCR protocols: a guide to methods and*  
490 *applications* (Ed. Innis MA, Gelfand DH, Sninsky JJ, White TJ; Academic Press Inc., New  
491 York, USA), 1990.
- 492 12. Abarenkov K, Henrik Nilsson R, Larsson KH, Alexander IJ, Eberhardt U, Erland S,  
493 Høiland K, Kjølner R, Larsson E, Pennanen T & Sen R, The UNITE database for molecular  
494 identification of fungi–recent updates and future perspectives. *New Phytol*, 186 (2010) 281.  
495 <http://doi.org/10.1111/j.1469-8137.2009.03160.x>
- 496 13. Rosa LH, Vieira M, Santiago IF & Rosa CA, Endophytic fungi community associated  
497 with the dicotyledonous plant *Colobanthus quitensis* (Kunth) Bartl. (*Caryophyllaceae*) in  
498 Antarctica. *FEMS Microbiol Ecol*, 73 (2010) 178.



- 499 14. Pirhadi M, Enayatizamir N, Motamedi H & Sorkheh K, Screening of salt tolerant  
500 sugarcane endophytic bacteria with potassium and zinc for their solubilizing and antifungal  
501 activity. *Biosci Biotechnol Res Commun*, 9 (2016) 530.
- 502 15. Abdellatif L, Bouzid S, Kaminskyj S & Vujanovic V, Endophytic hyphal  
503 compartmentalization is required for successful symbiotic Ascomycota association with root  
504 cells. *Mycol Res*, 113 (2009) 782.
- 505 16. Chung CL, Longfellow JM, Walsh EK, Kerdieh Z, Van Esbroeck G, Balint-Kurti P &  
506 Nelson RJ, Resistance loci affecting distinct stages of fungal pathogenesis: use of  
507 introgression lines for QTL mapping and characterization in the maize-*Setosphaeria turcica*  
508 pathosystem. *BMC Plant Biol*, 10 (2010) 1.
- 509 17. Ward Jr JH, Hierarchical grouping to optimize an objective function. *J Amer Statist*  
510 *Assoc*, 58 (1963) 236.
- 511 18. Ruppel S, Franken P & Witzel K, Properties of the halophyte microbiome and their  
512 implications for plant salt tolerance. *Funct Plant Biol*, 40 (2013) 940–951.
- 513 19. Jalili B, Bagheri H, Azadi S & Soltani J, Identification and salt tolerance evaluation of  
514 endophyte fungi isolates from halophyte plants. *Int J Environ Sci Technol*, 14 (2020) 1.
- 515 20. Roy SJ, Negrao S & Tester M, Salt resistant crop plants. *Curr Opin Biotechnol*, 26 (2014)  
516 115.
- 517 21. Yang H, Hu J, Long X & Liu Z, Salinity altered root distribution and increased diversity  
518 of bacterial communities in the rhizosphere soil of Jerusalem artichoke. *Sci Rep*, 6 (2016)  
519 20687. <https://doi.org/10.1038/srep20687>
- 520 22. Yeo A, Molecular biology of salt tolerance in the context of whole-plant physiology. *J*  
521 *Exp Bot*, 49 (1998) 915.
- 522 23. Mishra IG & Sharma A, Exogenously supplied osmoprotectants confer enhanced salinity  
523 tolerance in rhizobacteria. *J Ecobiotechnol*, 4 (2012) 11.
- 524 24. Samapundo S, Deschuyffeleer N, Van Laere D, De Leyn I & Devlieghere F, Effect of  
525 NaCl reduction and replacement on the growth of fungi important to the spoilage of bread.  
526 *Food Microbiol*, 27 (2010) 749.
- 527 25. Qin Y, Druzhinina IS & Pan XY, Microbially-mediated plant salt tolerance and  
528 microbiome-based solutions for saline agriculture. *Biotechnol Adv*, 34 (2016) 1245.
- 529 26. Qin Y, Pan X, Kubicek C, Druzhinina I, Chenthamara K, Labbé JL & Yuan Z, Diverse  
530 plant-associated pleosporalean fungi from saline areas: ecological tolerance and nitrogen-  
531 status dependent effects on plant growth. *Front Microbiol*, 8 (2017) 158.  
532 <http://doi.org/10.3389/fmicb.2017.00158>
- 533 27. Suryanarayanan TS & Kumaresan V, Endophytic fungi of some halophytes from an  
534 estuarine mangrove forest. *Mycol Res*, 104 (2000) 1465.
- 535 28. Cheng ZS, Tang WC, Xu SL, Sun SF, Huang BY, Yan X, Chen QJ & Lin YC, First  
536 report of an endophyte (*Diaporthe phaseolorum* var. *sojiae*) from *Kandelia candel*. *J Forest*  
537 *Res*, 19 (2008) 277.
- 538 29. Sakayaroj J, Preedanon S, Phongpaichit S, Buatong J, Chaowalit P & Rukachaisirikul V,  
539 Diversity of endophytic and marine-derived fungi associated with marine plants and animals.

- 540 In: *Marine fungi and fungal-like organisms*, (Ed. Jones EBG, Pang K-L, de Gruyter W. De  
541 Gruyter; GmbH and Co., Berlin) 2012, 291.
- 542 30. Debbab A, Aly AH & Proksch P, Mangrove derived fungal endophytes—a chemical and  
543 biological perception. *Fungal Div*, 61 (2013) 1.
- 544 31. Baltruschat H, Fodor J, Harrach BD, Niemczyk E, Barna B, Gullner G, Janeczko A,  
545 Kogel KH, Schäfer P, Schwarczinger I & Zuccaro A, Salt tolerance of barley induced by the  
546 root endophyte *Piriformospora indica* is associated with a strong increase in antioxidants.  
547 *New Phytol*, 180 (2008) 501.
- 548 32. Waqas M, Khan AL, Kamran M, Hamayun M, Kang SM, Kim YH & Lee IJ, Endophytic  
549 fungi produce gibberellins and indole acetic acid and promotes host-plant growth during  
550 stress. *Molecules*, 17 (2012) 10754.
- 551 33. Rashmi A, *Chaetomium globosum*: a potential biocontrol agent and its mechanism of  
552 action. *Indian Phytopathol*, 68 (2015) 8.
- 553 34. Darshan K, Aggarwal R, Bashyal BM, Singh J, Shanmugam V, Gurjar MS & Solanke  
554 AU, Transcriptome profiling provides insights into potential antagonistic mechanisms  
555 involved in *Chaetomium globosum* against *Bipolaris sorokiniana*. *Front Microbiol*, 11  
556 (2020).
- 557 35. Cong GQ, Yin CL, He BL, Li L & Gao KX, Effect of the endophytic fungus *Chaetomium*  
558 *globosum* ND35 on the growth and resistance to drought of winter wheat at the seedling stage  
559 under water stress. *Acta Ecol Sin*, 35 (2015) 6120.
